# Supplementary material for: Global trends in training and credentialing guidelines for gastrointestinal endoscopy: a systematic review
Source: PubMed Central journal article supplement — Endosc Int Open. 2023 Feb 23;11(2):E193–201. doi: 10.1055/a-1981-3047 (PMC9949985; doi:10.1055/a-1981-3047), 2023-02-23

## Supplemental Material

### Search Strategy:

Ovid MEDLINE: Epub Ahead of Print, In-Process & Other Non-Indexed Citations, Ovid MEDLINE Daily and Ovid MEDLINE <1946-Present> Embase Classic+Embase <1947 to 2022 March 04>

exp gastroenterology/ 68833  
exp colonoscopy/ 125831  
\*sigmoidoscopy/ 4442  
colonoscopic.ti,ab,kf. 12532  
sigmoidoscop\*.ti,ab,kf. 13341  
exp Endoscopy, Gastrointestinal/ 269167  
(?esophagus or stomach or duodenum or upper).ti,ab,kf. 1388068  
exp duodenum/ 100105  
exp stomach/ 357507  
7 or 8 or 9 1632686  
6 and 10 67009  
esophagogastroduodenoscop\*.ti,ab,kf. 13789  
egb.ab. 2550  
exp sigmoidoscopy/ 19067  
sigmoidoscop\*.ti,ab,kf. 13341  
\*Cholangiopancreatography, Endoscopic Retrograde/ 20578  
ERCP.ti,ab,kf. 35310  
exp echography/ or exp endoscopic echography/ 1370369  
Endoscopic ultrasound.ti,ab,kf. 27501  
EUS.ab. 32264  
Capsule Endoscopy/ 13570  
Capsule Endoscop\*.ti,ab,kf. 13368  
endoscopic echography/ 29716  
1 or 2 or 3 or 4 or 5 or 11 or 12 or 13 or 14 or 15 or 16 or 17 or 18 or 19 or 20 or 21 or 22 or 23 1700798  
exp endoscopic retrograde cholangiopancreatography/ 62380  
Cholangiopancreatograph:.ti,ab,kf. 30002  
Cholangiopancreatographic.ti,ab,kf. 194  
Cholangiopancreatography.ti,ab,kf. 29704  
Cholangiopancreatographies.ti,ab,kf. 265  
ERCP.ab. 31154  
exp pancreas/ or pancreas.mp. 644641  
(pancreas: or pancreatic).ti,ab,kf. 667932  
31 or 32 819175  
Endosonography/ 26449  
endoscope.ti,ab,kf. 32008

endoscopic.ti,ab,kf. 445162  
 endoscopies.ti,ab,kf. 10246  
 endoscopy.ti,ab,kf. 219438  
 ultrasonograph\*.ti,ab,kf. 295144  
 ultra sound.ti,ab,kf. 2373  
 ultrasound.ti,ab,kf. 732538  
 34 or 35 or 36 or 37 or 38 or 39 or 40 or 41 1482308  
 33 and 42 66997  
 25 or 26 or 27 or 28 or 29 or 30 or 43 123728  
 exp certification/ or \*"maintenance of certification"/ 50556  
 certification.ti,ab,kf. 43420  
 certif:.ti,ab,kf. 145995  
 exp accreditation/ 87120  
 credential\$.ti,ab,kf. 12669  
 exp licensing/ 117112  
 licensing.ti,ab,kf. 21133  
 licensure.ti,ab,kf. 12861  
 exp curriculum/ 195159  
 exp international cooperation/ 374751  
 Internationally trained.ti,ab,kf. 117  
 exp foreign medical graduate/ 3933  
 ((foreign or international\*) adj5 educat\*).ti,ab,kf. 8841  
 ((foreign or international\*) adj5 graduate\*).ti,ab,kf. 4559  
 qualification.ti,ab,kf. 23991  
 qualified.ti,ab,kf. 77335  
 45 or 46 or 47 or 48 or 49 or 50 or 51 or 52 or 53 or 54 or 55 or 56 or 58 or 59 or 60 936286  
 44 and 61 778  
 remove duplicates from 62 644

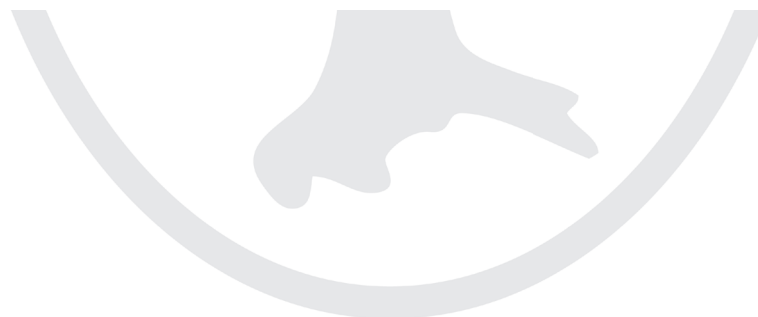

# PRISMA Checklist

| Section and Topic             | Item # | Checklist item                                                                                                                                                                                                                                                                                       | Location where item is reported |
|-------------------------------|--------|------------------------------------------------------------------------------------------------------------------------------------------------------------------------------------------------------------------------------------------------------------------------------------------------------|---------------------------------|
| <b>TITLE</b>                  |        |                                                                                                                                                                                                                                                                                                      |                                 |
| Title                         | 1      | Identify the report as a systematic review.                                                                                                                                                                                                                                                          | Page 1                          |
| <b>ABSTRACT</b>               |        |                                                                                                                                                                                                                                                                                                      |                                 |
| Abstract                      | 2      | See the PRISMA 2020 for Abstracts checklist.                                                                                                                                                                                                                                                         | Page 2                          |
| <b>INTRODUCTION</b>           |        |                                                                                                                                                                                                                                                                                                      |                                 |
| Rationale                     | 3      | Describe the rationale for the review in the context of existing knowledge.                                                                                                                                                                                                                          | Page 3                          |
| Objectives                    | 4      | Provide an explicit statement of the objective(s) or question(s) the review addresses.                                                                                                                                                                                                               | Page 3                          |
| <b>METHODS</b>                |        |                                                                                                                                                                                                                                                                                                      |                                 |
| Eligibility criteria          | 5      | Specify the inclusion and exclusion criteria for the review and how studies were grouped for the syntheses.                                                                                                                                                                                          | Page 4                          |
| Information sources           | 6      | Specify all databases, registers, websites, organisations, reference lists and other sources searched or consulted to identify studies. Specify the date when each source was last searched or consulted.                                                                                            | Page 4                          |
| Search strategy               | 7      | Present the full search strategies for all databases, registers and websites, including any filters and limits used.                                                                                                                                                                                 | Page 18                         |
| Selection process             | 8      | Specify the methods used to decide whether a study met the inclusion criteria of the review, including how many reviewers screened each record and each report retrieved, whether they worked independently, and if applicable, details of automation tools used in the process.                     | Page 4                          |
| Data collection process       | 9      | Specify the methods used to collect data from reports, including how many reviewers collected data from each report, whether they worked independently, any processes for obtaining or confirming data from study investigators, and if applicable, details of automation tools used in the process. | Page 4                          |
| Data items                    | 10a    | List and define all outcomes for which data were sought. Specify whether all results that were compatible with each outcome domain in each study were sought (e.g. for all measures, time points, analyses), and if not, the methods used to decide which results to collect.                        | Page 4                          |
|                               | 10b    | List and define all other variables for which data were sought (e.g. participant and intervention characteristics, funding sources). Describe any assumptions made about any missing or unclear information.                                                                                         | Page 4                          |
| Study risk of bias assessment | 11     | Specify the methods used to assess risk of bias in the included studies, including details of the tool(s) used, how many reviewers assessed each study and whether they worked independently, and if applicable, details of automation tools used in the process.                                    | Page 5                          |
| Effect measures               | 12     | Specify for each outcome the effect measure(s) (e.g. risk ratio, mean difference) used in the synthesis or presentation of results.                                                                                                                                                                  | Page 5                          |
| Synthesis methods             | 13a    | Describe the processes used to decide which studies were eligible for each synthesis (e.g. tabulating the study intervention characteristics and comparing against the planned groups for each synthesis (item #5)).                                                                                 | Page 5                          |

| Section and Topic             | Item # | Checklist item                                                                                                                                                                                                                                                                       | Location where item is reported |
|-------------------------------|--------|--------------------------------------------------------------------------------------------------------------------------------------------------------------------------------------------------------------------------------------------------------------------------------------|---------------------------------|
|                               | 13b    | Describe any methods required to prepare the data for presentation or synthesis, such as handling of missing summary statistics, or data conversions.                                                                                                                                | Page 5                          |
|                               | 13c    | Describe any methods used to tabulate or visually display results of individual studies and syntheses.                                                                                                                                                                               | Page 5                          |
|                               | 13d    | Describe any methods used to synthesize results and provide a rationale for the choice(s). If meta-analysis was performed, describe the model(s), method(s) to identify the presence and extent of statistical heterogeneity, and software package(s) used.                          | N/A                             |
|                               | 13e    | Describe any methods used to explore possible causes of heterogeneity among study results (e.g. subgroup analysis, meta-regression).                                                                                                                                                 | N/A                             |
|                               | 13f    | Describe any sensitivity analyses conducted to assess robustness of the synthesized results.                                                                                                                                                                                         | N/A                             |
| Reporting bias assessment     | 14     | Describe any methods used to assess risk of bias due to missing results in a synthesis (arising from reporting biases).                                                                                                                                                              | Page 5                          |
| Certainty assessment          | 15     | Describe any methods used to assess certainty (or confidence) in the body of evidence for an outcome.                                                                                                                                                                                | N/A                             |
| <b>RESULTS</b>                |        |                                                                                                                                                                                                                                                                                      |                                 |
| Study selection               | 16a    | Describe the results of the search and selection process, from the number of records identified in the search to the number of studies included in the review, ideally using a flow diagram.                                                                                         | Page 5                          |
|                               | 16b    | Cite studies that might appear to meet the inclusion criteria, but which were excluded, and explain why they were excluded.                                                                                                                                                          | N/A                             |
| Study characteristics         | 17     | Cite each included study and present its characteristics.                                                                                                                                                                                                                            | Page 5                          |
| Risk of bias in studies       | 18     | Present assessments of risk of bias for each included study.                                                                                                                                                                                                                         | N/A                             |
| Results of individual studies | 19     | For all outcomes, present, for each study: (a) summary statistics for each group (where appropriate) and (b) an effect estimate and its precision (e.g. confidence/credible interval), ideally using structured tables or plots.                                                     | Page 5                          |
| Results of syntheses          | 20a    | For each synthesis, briefly summarise the characteristics and risk of bias among contributing studies.                                                                                                                                                                               | N/A                             |
|                               | 20b    | Present results of all statistical syntheses conducted. If meta-analysis was done, present for each the summary estimate and its precision (e.g. confidence/credible interval) and measures of statistical heterogeneity. If comparing groups, describe the direction of the effect. | N/A                             |
|                               | 20c    | Present results of all investigations of possible causes of heterogeneity among study results.                                                                                                                                                                                       | NA                              |
|                               | 20d    | Present results of all sensitivity analyses conducted to assess the robustness of the synthesized results.                                                                                                                                                                           | N/A                             |
| Reporting biases              | 21     | Present assessments of risk of bias due to missing results (arising from reporting biases) for each synthesis assessed.                                                                                                                                                              | NA                              |
| Certainty of evidence         | 22     | Present assessments of certainty (or confidence) in the body of evidence for each outcome assessed.                                                                                                                                                                                  | N/A                             |

| Section and Topic                              | Item # | Checklist item                                                                                                                                                                                                                             | Location where item is reported |
|------------------------------------------------|--------|--------------------------------------------------------------------------------------------------------------------------------------------------------------------------------------------------------------------------------------------|---------------------------------|
| <b>DISCUSSION</b>                              |        |                                                                                                                                                                                                                                            |                                 |
| Discussion                                     | 23a    | Provide a general interpretation of the results in the context of other evidence.                                                                                                                                                          | Page 7                          |
|                                                | 23b    | Discuss any limitations of the evidence included in the review.                                                                                                                                                                            | Page 8                          |
|                                                | 23c    | Discuss any limitations of the review processes used.                                                                                                                                                                                      | Page 8                          |
|                                                | 23d    | Discuss implications of the results for practice, policy, and future research.                                                                                                                                                             | Page 8                          |
| <b>OTHER INFORMATION</b>                       |        |                                                                                                                                                                                                                                            |                                 |
| Registration and protocol                      | 24a    | Provide registration information for the review, including register name and registration number, or state that the review was not registered.                                                                                             | Page 3                          |
|                                                | 24b    | Indicate where the review protocol can be accessed, or state that a protocol was not prepared.                                                                                                                                             | Prospero                        |
|                                                | 24c    | Describe and explain any amendments to information provided at registration or in the protocol.                                                                                                                                            | N/A                             |
| Support                                        | 25     | Describe sources of financial or non-financial support for the review, and the role of the funders or sponsors in the review.                                                                                                              | Page 1                          |
| Competing interests                            | 26     | Declare any competing interests of review authors.                                                                                                                                                                                         | Page 1                          |
| Availability of data, code and other materials | 27     | Report which of the following are publicly available and where they can be found: template data collection forms; data extracted from included studies; data used for all analyses; analytic code; any other materials used in the review. | N/A                             |

From: Moher D, Liberati A, Tetzlaff J, Altman DG, The PRISMA Group (2009). Preferred Reporting Items for Systematic Reviews and Meta-Analyses: The PRISMA Statement. PLoS Med 6(7): e1000097. doi:10.1371/journal.pmed1000097

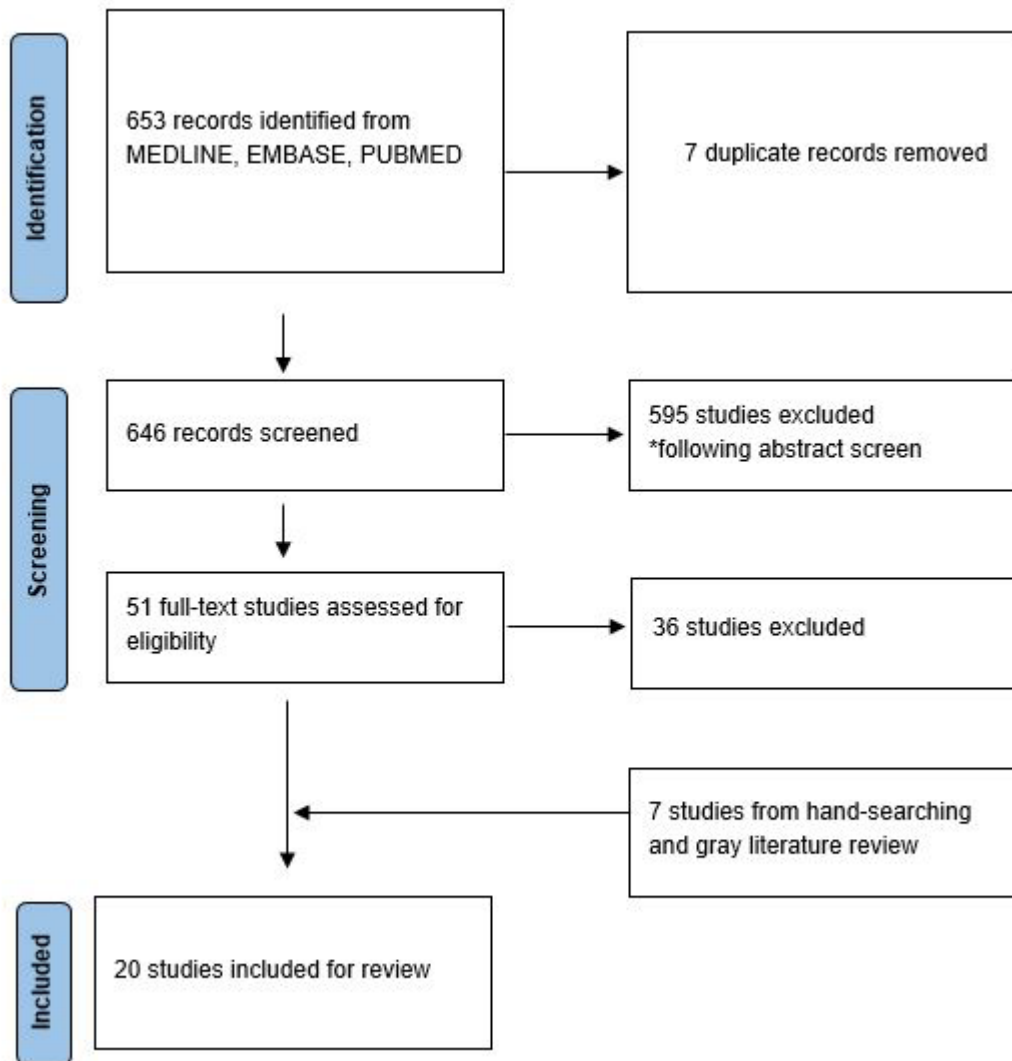

Supplemental figure 1. From: Moher D, Liberati A, Tetzlaff J, Altman DG, The PRISMA Group (2009). Preferred Reporting Items for Systematic Reviews and Meta-Analyses: The PRISMA Statement. PLoS Med 6(7): e1000097. doi:10.1371/journal.pmed1000097

Table S1: Key performance indicators for endoscopic ultrasound (EUS)

| Society or Training Committee, Country/Region (Year) | Assessment Tool                                 | Key Performance Indicators                                                                                              |                                                            |
|------------------------------------------------------|-------------------------------------------------|-------------------------------------------------------------------------------------------------------------------------|------------------------------------------------------------|
|                                                      |                                                 | Minimum Procedures                                                                                                      | Minimum number of EUS-guided Fine Needle Aspirations (FNA) |
| ESGE, Europe (2021)                                  | DOPS and TEESAT recommended to track competency | 250 cases with visualization of key anatomical landmarks in > 90% of cases, first 25 supervised by experienced operator | 75 supervised (with >85% accuracy)                         |
| ASGE, United States (2017)                           | -                                               | -                                                                                                                       | 50 supervised                                              |
| ASGE, United States (2001)                           | -                                               | 150 supervised (incl. 75 pancreaticobiliary cases)                                                                      | 50 supervised                                              |
| FOCUS, Canada (2015)                                 | -                                               | 250 supervised (incl. 25 rectal cases, 10 celiac blocks/neurolysis, 100 pancreatic cases)                               | 50 supervised                                              |
| Conjoint Committee, Australia* (2015)                | -                                               | 200 (incl. 100 for gastro-esophageal lesions & 100 for pancreato-biliary investigations)                                | 50 (at least 25 pancreatobiliary cases)                    |
| Academy of Medicine, Singapore (2010)                | -                                               | -                                                                                                                       | 50 supervised                                              |

- : Not Reported

ASGE: American Association of Gastroenterology

ESGE: European Association of Gastrointestinal Endoscopy

FOCUS: The Forum on Canadian Endoscopic Ultrasound

\*Conjoint committee for recognition of training in gastrointestinal endoscopy (including the Royal Australasian College of Surgeons, Gastroenterological Society of Australia and Royal Australasian College of Physicians)

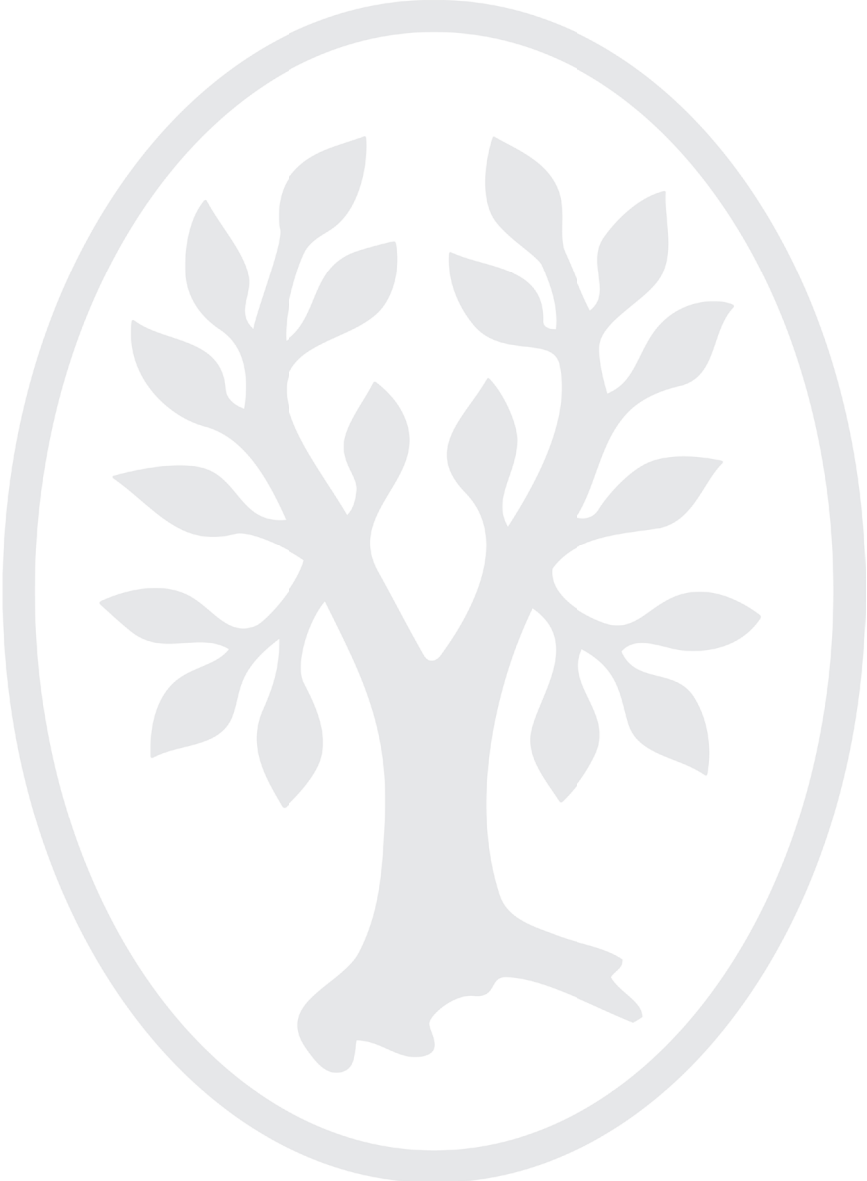



Table S2: Key performance indicators for capsule endoscopy

| Society or Training Committee,<br>Country/Region<br>(Year) | Key Performance Indicators                               |                                                                                                                                                                                                                                                                                            |
|------------------------------------------------------------|----------------------------------------------------------|--------------------------------------------------------------------------------------------------------------------------------------------------------------------------------------------------------------------------------------------------------------------------------------------|
|                                                            | Assessment Tool                                          | Minimum Procedures and Training                                                                                                                                                                                                                                                            |
| JAG, United Kingdom                                        | 5 capsule endoscopy and capsule endoscopy reporting DOPS | 15 cases, double reading of videos with feedback via DOPS from an expert in CCE                                                                                                                                                                                                            |
| ASGE, United States (2017)                                 | -                                                        | 20 supervised                                                                                                                                                                                                                                                                              |
| ASGE, United States (2005)                                 | -                                                        | 1) Formal training in capsule endoscopy during GI fellowship<br>OR<br>2) Completion of a hands-on course with a minimum of 8 hours CME credit, endorsed by a national or international GI or surgical society and review of first 10 capsule studies by a credentialed capsule endoscopist |
| KSGE, Korea (2008)                                         | -                                                        | 20 (incl. 10 supervised)                                                                                                                                                                                                                                                                   |
| Conjoint Committee, Australia*<br>(2015)                   | -                                                        | 50 supervised with at least 25 abnormal and 5 studies where trainee is wholly responsible for entire procedure. Attendance at a recognised capsule endoscopy training workshop.                                                                                                            |

- : Not Reported

ASGE: American Association of Gastroenterology

JAG: Joint Advisory Group on Gastrointestinal Endoscopy

KSGE: Korea Association of Gastrointestinal Endoscopy

\*Conjoint committee for recognition of training in gastrointestinal endoscopy (including the Royal Australasian College of Surgeons, Gastroenterological Society of Australia and Royal Australasian College of Physicians)

Table S3: Key performance indicators for flexible sigmoidoscopy

| Society or Training Committee, Country/Region (Year) | Assessment Tool                                   | Key Performance Indicators   |                                                 |
|------------------------------------------------------|---------------------------------------------------|------------------------------|-------------------------------------------------|
|                                                      |                                                   | Minimum Procedures           | Depth of Insertion                              |
| JAG, United Kingdom                                  | >20 lower GI DOPS, competent as per 5 most recent | 100 (15 in last 3 months)    | -                                               |
| ASGE, United States (2017)                           | -                                                 | 30 (incl. 20 supervised)     | Consistent depth of >50cm                       |
| CAG, Canada (2009)                                   | -                                                 | 25 supervised, 30 unassisted | Must be able to evaluate the rectum and sigmoid |

- : Not Reported

CAG: Canadian Association of Gastroenterology

ASGE: American Association of Gastroenterology

JAG: Joint Advisory Group on Gastrointestinal Endoscopy

Table S4: Guideline characteristics

| Guideline ID             | Society or Training Committee, Country/Region | Journal                                      | Funding | Conflict of Interest |
|--------------------------|-----------------------------------------------|----------------------------------------------|---------|----------------------|
| Johnson et. al (2021)    | ESGE, Europe                                  | Endoscopy                                    | NR      | Conflicts reported   |
| NR                       | JAG, United Kingdom                           | Website                                      | NR      | NR                   |
| Siau et. al (2022)       | JAG, United Kingdom                           | Endoscopy International Open                 | NR      | No Conflicts         |
| Siau et. al (2022)       | JAG, United Kingdom                           | Frontline Gastroenterology                   | NR      | No Conflicts         |
| Faulx et al. (2017)      | ASGE, United States                           | Gastrointestinal Endoscopy                   | NR      | NR                   |
| Eisen et. al (2001)      | ASGE, United States                           | Gastrointestinal Endoscopy                   | NR      | NR                   |
| Faigel et. al (2005)     | ASGE, United States                           | Gastrointestinal Endoscopy                   | NR      | NR                   |
| Seok Moon et. al (2017)  | KSGE, Korea                                   | Clinical Endoscopy                           | NR      | No Conflicts         |
| Jeong Lim et. al (2008)  | KSGE, Korea                                   | Korean Journal of Gastrointestinal Endoscopy | NR      | NR                   |
| NR                       | PSG, Poland                                   | Website                                      | NR      | NR                   |
| NR (2013)                | SSG, Switzerland                              | Website                                      | NR      | NR                   |
| Ponich et. al (2008)     | CAG, Canada                                   | Canadian Journal of Gastroenterology         | NR      | NR                   |
| Enns et. al (2009)       | CAG, Canada                                   | Canadian Journal of Gastroenterology         | NR      | NR                   |
| Springer et. al (2008)   | CAG, Canada                                   | Canadian Journal of Gastroenterology         | NR      | NR                   |
| Romagnuolo et at. (2008) | CAG, Canada                                   | Canadian Journal of Gastroenterology         | NR      | NR                   |
| Arya et. al (2015)       | FOCUS, Canada                                 | Endoscopic Ultrasound                        | NR      | NR                   |
| NR (2015)                | Conjoint Committee, Australia*                | Website                                      | NR      | NR                   |
| NR (2022)                | NZCCRTGE , New Zealand <sup>Ⓛ</sup>           | Website                                      | NR      | NR                   |

|                       |                                                                               |                            |    |    |
|-----------------------|-------------------------------------------------------------------------------|----------------------------|----|----|
| Ang T L et. al (2011) | ERCP working group (under the auspices of the Academy of Medicine, Singapore) | Singapore Medical Journal  | NR | NR |
| Menasas et. al (2010) | Academy of Medicine, Singapore                                                | Annals Academy of Medicine | NR | NR |

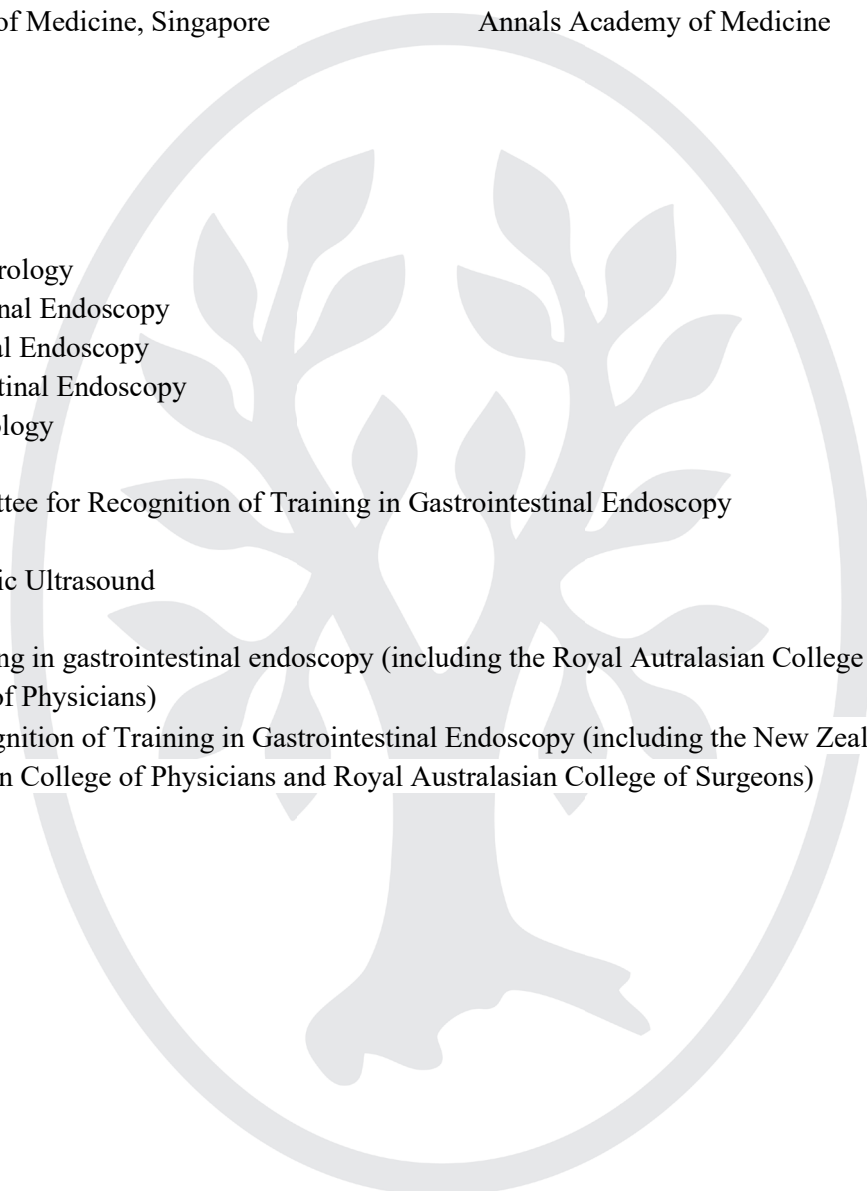

NR – Not Reported

ASGE – American Association of Gastroenterology

JAG – Joint Advisory Group on Gastrointestinal Endoscopy

KSGE – Korea Association of Gastrointestinal Endoscopy

ESGE – European Association of Gastrointestinal Endoscopy

CAG – Canadian Association of Gastroenterology

SSG – Swiss Society of Gastroenterology

NZCCRTGE: New Zealand Conjoint Committee for Recognition of Training in Gastrointestinal Endoscopy

PSG – Polish Society of Gastroenterology

FOCUS – The Forum on Canadian Endoscopic Ultrasound

\*Conjoint committee for recognition of training in gastrointestinal endoscopy (including the Royal Australasian College of Surgeons, Gastroenterological Society of Australia and Royal Australasian College of Physicians)

<sup>φ</sup>New Zealand Conjoint Committee for Recognition of Training in Gastrointestinal Endoscopy (including the New Zealand Society of Gastroenterology, the New Zealand Committees of the Royal Australasian College of Physicians and Royal Australasian College of Surgeons)

Table S5: Credentialing guidelines by GI endoscopy societies and affiliated training committees

| Society, Country/Region                           | Colonoscopy       | EGD                    | Flex. Sig.   | ERCP                        | EUS                         | Capsule Endoscopy            |
|---------------------------------------------------|-------------------|------------------------|--------------|-----------------------------|-----------------------------|------------------------------|
| <b>ESGE, Europe</b>                               | -                 | -                      | -            | Johnson (2021) <sup>u</sup> | Johnson (2021) <sup>u</sup> | -                            |
| <b>JAG, United Kingdom<sup>y</sup></b>            | JAG (NR)          | JAG (NR)   Siau (2022) | JAG (NR)     | JAG (NR)   Siau (2022)      | -                           | JAG (NR)                     |
| <b>ASGE, United States</b>                        | Faulx (2017)      | Faulx (2017)           | Faulx (2017) | Faulx (2017)                | Faulx (2017)   Eisen (2001) | Faulx (2017)   Faigel (2005) |
| <b>KSGE, Korea</b>                                | Seok Moon (2017)  | Seok Moon (2017)       | -            | Seok Moon (2017)            | Seok Moon (2017)            | Jeong Lim (2008)             |
| <b>PSG, Poland<sup>y</sup></b>                    | -                 | -                      | -            | PSG (NR)                    | -                           | -                            |
| <b>SSG, Switzerland<sup>y</sup></b>               | -                 | SSG (2013)             | -            | SSG (2015)                  | -                           | -                            |
| <b>CAG, Canada</b>                                | Romagnuolo (2008) | Ponich (2008)          | Enns (2009)  | Springer (2008)             | -                           | -                            |
| <b>FOCUS, Canada</b>                              | -                 | -                      | -            | -                           | Arya (2015)                 | -                            |
| <b>Conjoint Committee, Australia<sup>*y</sup></b> | CC (2015)         | CC (2015)              | -            | CC (2015)                   | CC (2015)                   | CC (2015)                    |
| <b>NZCCRTGE, New Zealand<sup>ϕy</sup></b>         | NZCCRTGE (NR)     | NZCCRTGE (NR)          | -            | NZCCRTGE (NR)               | -                           | -                            |
| <b>Academy of Medicine, Singapore</b>             | -                 | -                      | -            | -                           | Mesenas (2010)              | -                            |
| <b>ERCP working group<sup>^</sup></b>             | -                 | -                      | -            | Ang T L (2011)              | -                           | -                            |

NR – Not Reported

ASGE – American Association of Gastroenterology

JAG – Joint Advisory Group on Gastrointestinal Endoscopy

KSGE – Korea Association of Gastrointestinal Endoscopy

ESGE – European Association of Gastrointestinal Endoscopy

CAG – Canadian Association of Gastroenterology

SSG – Swiss Society of Gastroenterology

NZCCRTGE–New Zealand Conjoint Committee for Recognition of Training in Gastrointestinal Endoscopy

CC – Conjoint Committee

PSG – Polish Society of Gastroenterology

FOCUS – The Forum on Canadian Endoscopic Ultrasound

\*Conjoint committee for recognition of training in gastrointestinal endoscopy (including the Royal Australasian College of Surgeons, Gastroenterological Society of Australia and Royal Australasian College of Physicians)

<sup>o</sup>New Zealand Conjoint Committee for Recognition of Training in Gastrointestinal Endoscopy (including the New Zealand Society of Gastroenterology, the New Zealand Committees of the Royal Australasian College of Physicians and Royal Australasian College of Surgeons)

<sup>^</sup> Society is under the auspices of the Academy of Medicine, Singapore

<sup>γ</sup> Authorship not available

<sup>μ</sup> Competing interest reported

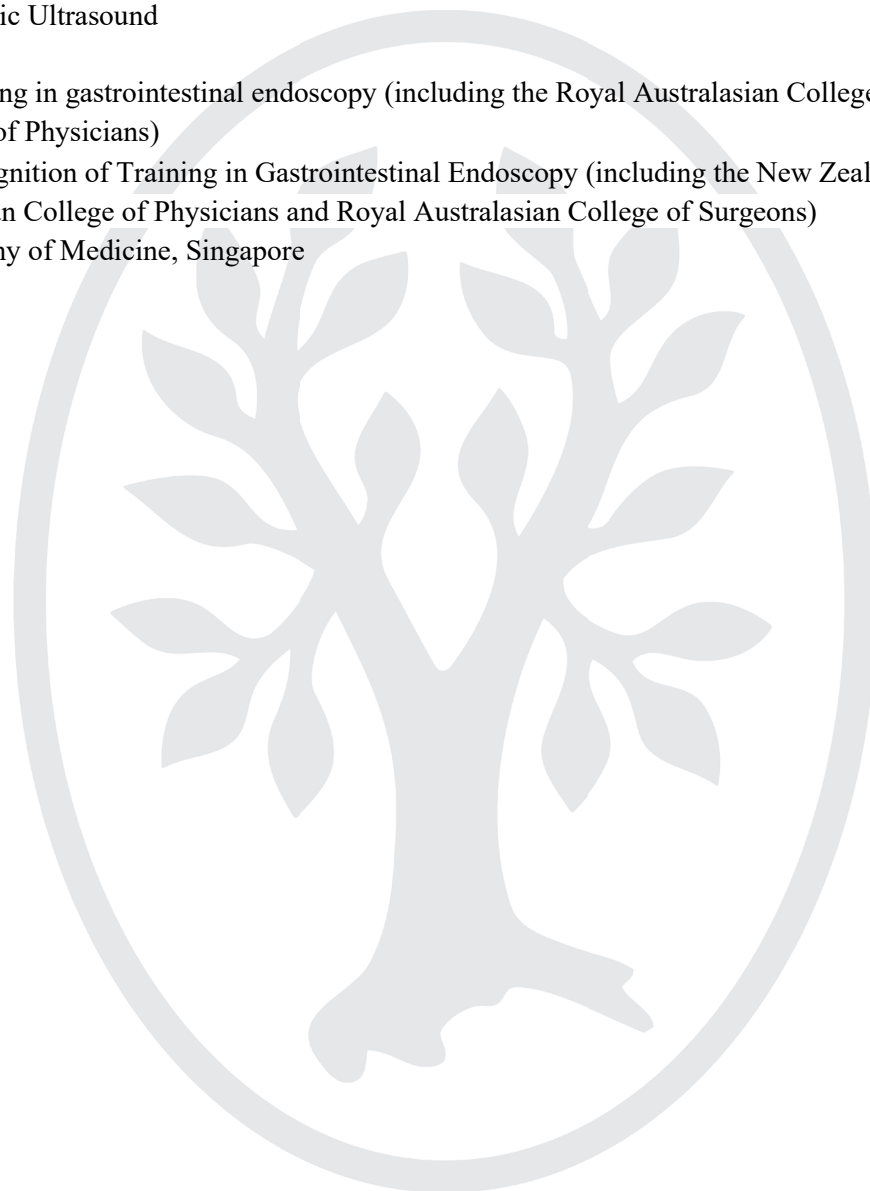

Supplement: 2807supmat_10-1055-a-1981-3047.pdf [file 2807supmat_10-1055-a-1981-3047.pdf]
